# Supplementary material
Source: MDPI journal article supplement (https://www.mdpi.com/2304-6767/11/4/98)
Supplement: s1 [file s1]

## Synchrotron X-ray Studies of the Structural and Functional Hierarchies in Mineralised Human Dental Enamel: A State-Of-The-Art Review

### Authors

Cyril Besnard<sup>\*1</sup>, Ali Marie<sup>†1</sup>, Sisini Sasidharan<sup>†1</sup>, Robert A. Harper<sup>2</sup>, Richard M. Shelton<sup>2</sup>, Gabriel Landini<sup>2</sup>, Alexander M. Korsunsky<sup>1\*</sup>

<sup>1</sup> MBLEM, Department of Engineering Science, University of Oxford, Parks Road, Oxford, Oxfordshire, OX1 3PJ, U.K.

<sup>2</sup> School of Dentistry, University of Birmingham, 5 Mill Pool Way, Edgbaston, Birmingham, West Midlands, B5 7EG, U.K.

† These authors contributed equally to this work.

### Email addresses:

cyril.besnard@eng.ox.ac.uk, ali.marie@eng.ox.ac.uk, sisini.sasidharan@eng.ox.ac.uk, R.Harper@bham.ac.uk, R.M.Shelton@bham.ac.uk, G.Landini@bham.ac.uk, alexander.korsunsky@eng.ox.ac.uk

\* **Corresponding authors:** Alexander M. Korsunsky, alexander.korsunsky@eng.ox.ac.uk

Cyril Besnard, cyril.besnard@eng.ox.ac.uk

## Supplementary Information (SI)

## Table of Contents

|          |         |
|----------|---------|
| Table S1 | pp. 3-5 |
| Table S2 | pp. 6-9 |

Supplementary Table S1. Analysis of elements in enamel. Elements that are analysed in human enamel and *A. Africanus* with the techniques used.

| Atomic number | Element | References                          | Technique                                                                                                                                                                                                                                                                                                                                                                                                                                                                                                            |
|---------------|---------|-------------------------------------|----------------------------------------------------------------------------------------------------------------------------------------------------------------------------------------------------------------------------------------------------------------------------------------------------------------------------------------------------------------------------------------------------------------------------------------------------------------------------------------------------------------------|
| 1             | H       | 1-10                                | X-ray diffraction (XRD), neutron, atom probe tomography (APT), Fourier-transform infrared spectroscopy (FTIR), Raman spectroscopy, Raman spectroscopy, element analysis (EA)-thermogravimetric and differential thermal analysis (TGA/DTA), FTIR, time-of-light secondary ion mass spectrometry (ToF-SIMS), FTIR, Raman spectroscopy, Raman spectroscopy                                                                                                                                                             |
| 3             | Li      | 11,12                               | Spark source mass spectrometry (SSMS), laser-ablation inductively coupled-plasma mass spectrometry (LA-ICP-MS)                                                                                                                                                                                                                                                                                                                                                                                                       |
| 4             | Be      | 11                                  | Spark plasma mass spectrometry (SSMS)                                                                                                                                                                                                                                                                                                                                                                                                                                                                                |
| 5             | B       | 11                                  | SSMS                                                                                                                                                                                                                                                                                                                                                                                                                                                                                                                 |
| 6             | C       | 1-10,13-28                          | APT, FTIR, Raman spectroscopy, Raman spectroscopy, EA, X-ray photoelectron spectroscopy- energy dispersive X-ray spectroscopy (XPS-EDS)-FTIR, ToF-SIMS- X-ray micro analyses (XRMA), FITR, Raman spectroscopy, Raman spectroscopy, APT- electron energy loss spectroscopy (EELS), elemental analysis, Raman spectroscopy, Raman spectroscopy, Raman spectroscopy, Raman spectroscopy, XPS, XPS, Raman spectroscopy, EDS, electron energy-loss near-edge structures (ELNES), XRMA, XRMA, SIMS, Raman spectroscopy, IR |
| 7             | N       | 1,2,5-9,14,19,20,23                 | APT, FTIR, EA, XPS-EDS, ToF-SIMS, FTIR, Raman spectroscopy, elemental analysis, XPS, XPS, ELNES                                                                                                                                                                                                                                                                                                                                                                                                                      |
| 8             | O       | 1-10,13,15-25,27-30                 | XRD, neutron, APT, FTIR, Raman spectroscopy, Raman spectroscopy-electron microprobe analysis (EMP) wavelength-dispersive X-ray spectroscopy (WDS), TGA/DTA, XPS-EDS-FTIR, ToF-SIMS, FTIR, Raman spectroscopy, Raman spectroscopy, EELS, Raman spectroscopy, Raman spectroscopy, Raman spectroscopy, Raman spectroscopy, XPS, XPS, Raman spectroscopy, EDS, ELNES, XRMA, XRMA, Raman spectroscopy, IR, EDS, Raman spectroscopy                                                                                        |
| 9             | F       | 1,4,7,11,13,19,20,24,26,29,31,32    | APT, EMP (WDS) , ToF-SIMS, SSMS, APT, XPS, XPS, SIMS, SIMS, EDS, secondary ion microanalyzer, magic angle spinning nuclear magnetic resonance (MAS-NMR)                                                                                                                                                                                                                                                                                                                                                              |
| 11            | Na      | 1,5,7,13,14,19,20,24,25,28,29,33-36 | APT, instrumental neutron activation analysis (INAA), ToF-SIMS-XRMA, APT, wavelength dispersive X-ray fluorescence, XPS, XPS-EDS, X-ray energy dispersive spectroscopy (XEDS), SIMS, XRMA, EDS, EDS, EDS, proton induced X-ray emission (PIXE), LA-ICP-MS, LA-ICP-MS                                                                                                                                                                                                                                                 |
| 12            | Mg      | 1,4,5,7,13,14,19,20,25,26,28,33-37  | APT, EMP (WDS), inductively-coupled plasma spectrometer (ICP/AES), ToF-SIMS-XRMA, APT-EELS- X-ray absorption near edge structure (XANES), wavelength dispersive X-ray fluorescence, XPS, XPS-EDS, XEDS, SIMS, XRMA, SIMS, EDS, EDS, proton induced X-ray emission (PIXE), LA-ICP-MS, LA-ICP-MS, LA-ICP-MS                                                                                                                                                                                                            |

|    |    |                                       |                                                                                                                                                                                                                                                                                                                                                                                                                                                                                                  |
|----|----|---------------------------------------|--------------------------------------------------------------------------------------------------------------------------------------------------------------------------------------------------------------------------------------------------------------------------------------------------------------------------------------------------------------------------------------------------------------------------------------------------------------------------------------------------|
| 13 | Al | 5,11,34-36                            | Instrumental neutron activation analysis, SSMS, proton induced X-ray emission (PIXE), LA-ICP-MS, LA-ICP-MS                                                                                                                                                                                                                                                                                                                                                                                       |
| 14 | Si | 14,19,20                              | Wavelength dispersive X-ray fluorescence, XPS, XPS-EDS                                                                                                                                                                                                                                                                                                                                                                                                                                           |
| 15 | P  | 1-10,13-25,27-30,33-35,38,39          | XRD, neutron, APT, FTIR, Raman spectroscopy, Raman spectroscopy-EMP (WDS), TGA/DTA-ICP/AES, XPS-EDS-FTIR, ToF-SIMS-XRMA, FTIR, Raman spectroscopy, Raman spectroscopy, EELS, Raman spectroscopy, wavelength dispersive X-ray fluorescence, Raman spectroscopy, Raman spectroscopy, Raman spectroscopy, XPS, XPS-EDS, Raman spectroscopy-ICP-EDS, EDS, ELNES-XEDS, XRMA, XRMA, EDS, IR, Raman spectroscopy, Raman spectroscopy, EDS, proton induced X-ray emission (PIXE), LA-ICP-MS, XRF, ICP-MS |
| 16 | S  | 4,11,14,19,34,38                      | EMP (WDS), SSMS, wavelength dispersive X-ray fluorescence, XPS, proton induced X-ray emission (PIXE), XRF                                                                                                                                                                                                                                                                                                                                                                                        |
| 17 | Cl | 1,4,5,7,14,19,20,24,25,28,33-35,38    | APT, EMP (WDS), instrumental neutron activation analysis, ToF-SIMS-XRMA, wavelength dispersive X-ray fluorescence, XPS, XPS, SIMS, XRMA, EDS, EDS, proton induced X-ray emission (PIXE), LA-ICP-MS, XRF                                                                                                                                                                                                                                                                                          |
| 19 | K  | 4,7,11,14,24,25,28,29,38              | EMP (WDS), ToF-SIMS-XRMA, SSMS, wavelength dispersive X-ray fluorescence, SIMS, XRMA, EDS, EDS, XRF                                                                                                                                                                                                                                                                                                                                                                                              |
| 20 | Ca | 1,4-7,9,12,13,20-25,28,29,33,34,37-47 | XRD, neutron, APT, EMP (WDS), instrumental neutron activation analysis, EELS, ToF-SIMS-XRMA, Raman spectroscopy-XANES, LA-ICP-MS, XPS-EDS, XPS-EDS, ICP-EDS, EDS, ELNES-XEDS, XRMA, XRMA, EDS- calcium-ion-specific electrode, EDS, EDS, proton induced X-ray emission (PIXE), LA-ICP-MS, XRF, XRF, XRF, ICP-MS, XANES, XANES (PIC), XRF, particle induced X-ray emission, particle induced x-ray emission, XRF                                                                                  |
| 21 | Sc | 35,36                                 | LA-ICP-MS, LA-ICP-MS                                                                                                                                                                                                                                                                                                                                                                                                                                                                             |
| 22 | Ti | 11,35,36                              | SSMS, LA-ICP-MS, LA-ICP-MS                                                                                                                                                                                                                                                                                                                                                                                                                                                                       |
| 23 | V  | 11,34,36,46                           | SSMS, proton induced X-ray emission (PIXE), LA-ICP-MS, XRF                                                                                                                                                                                                                                                                                                                                                                                                                                       |
| 24 | Cr | 11,34,36                              | SSMS, proton induced X-ray emission (PIXE), LA-ICP-MS                                                                                                                                                                                                                                                                                                                                                                                                                                            |
| 25 | Mn | 11,34,36,45,46,48,49                  | SSMS, proton induced X-ray emission (PIXE), LA-ICP-MS, XRF, XRF, XRF, XRF                                                                                                                                                                                                                                                                                                                                                                                                                        |
| 26 | Fe | 11,14,34,36-38,40,45,46,48,49         | SSMS, wavelength dispersive X-ray fluorescence, proton induced X-ray emission (PIXE), LA-ICP-MS, LA-ICP-MS, XRF, XRF, XRF, XRF, XRF,                                                                                                                                                                                                                                                                                                                                                             |
| 27 | Co | 5,11,36                               | Instrumental neutron activation analysis, SSMS, LA-ICP-MS                                                                                                                                                                                                                                                                                                                                                                                                                                        |
| 28 | Ni | 11,34,36                              | SSMS, proton induced X-ray emission (PIXE), LA-ICP-MS                                                                                                                                                                                                                                                                                                                                                                                                                                            |
| 29 | Cu | 11,14,34,36-38,40,45,46,48,49         | SSMS, wavelength dispersive X-ray fluorescence, proton induced X-ray emission (PIXE), LA-ICP-MS, LA-ICP-MS, XRF, XRF, XRF, XRF, XRF                                                                                                                                                                                                                                                                                                                                                              |
| 30 | Zn | 5,11,14,19,34-38,40,41,44-46,48,49    | Instrumental neutron activation analysis, SSMS, wavelength dispersive X-ray fluorescence, XPS, proton induced X-ray emission (PIXE), LA-ICP-MS, LA-ICP-MS, LA-ICP-MS, XRF, XRF, XRF, XRF, XRF, XRF, XRF                                                                                                                                                                                                                                                                                          |
| 34 | Se | 11                                    | SSMS                                                                                                                                                                                                                                                                                                                                                                                                                                                                                             |

|    |    |                                    |                                                                                                                                                                                             |
|----|----|------------------------------------|---------------------------------------------------------------------------------------------------------------------------------------------------------------------------------------------|
| 35 | Br | 11,40,46,48,49                     | SSMS, XRF, XRF, XRF, XRF                                                                                                                                                                    |
| 37 | Rb | 11,36                              | SSMS, LA-ICP-MS                                                                                                                                                                             |
| 38 | Sr | 7,11,12,14,34-37,39-41,44-46,48,49 | ToF-SIMS, SSMS, LA-ICP-MS, wavelength dispersive X-ray fluorescence, SIMS, proton induced X-ray emission (PIXE), LA-ICP-MS, LA-ICP-MS, LA-ICP-MS, ICP-MS, XRF, XRF, XRF, XRF, XRF, XRF, XRF |
| 39 | Y  | 36                                 | LA-ICP-MS                                                                                                                                                                                   |
| 40 | Zr | 11                                 | SSMS                                                                                                                                                                                        |
| 41 | Nb | 11                                 | SSMS                                                                                                                                                                                        |
| 42 | Mo | 11                                 | SSMS                                                                                                                                                                                        |
| 47 | Ag | 11                                 | SSMS                                                                                                                                                                                        |
| 48 | Cd | 11                                 | SSMS                                                                                                                                                                                        |
| 50 | Sn | 11                                 | SSMS                                                                                                                                                                                        |
| 51 | Sb | 11                                 | SSMS                                                                                                                                                                                        |
| 53 | I  | 11,35                              | SSMS, LA-ICP-MS                                                                                                                                                                             |
| 56 | Ba | 11,12,26,35,36,39,45               | SSMS, LA-ICP-MS, SIMS, LA-ICP-MS, LA-ICP-MS, ICP-MS, XRF                                                                                                                                    |
| 57 | La | 36                                 | LA-ICP-MS                                                                                                                                                                                   |
| 71 | Lu | 36                                 | LA-ICP-MS                                                                                                                                                                                   |
| 73 | Ta | 5                                  | Instrumental neutron activation analysis                                                                                                                                                    |
| 74 | W  | 5                                  | Instrumental neutron activation analysis                                                                                                                                                    |
| 80 | Hg | 35                                 | LA-ICP-MS                                                                                                                                                                                   |
| 82 | Pb | 11,26,34,36,37,39,40,45,46,48,49   | SSMS, SIMS, proton induced X-ray emission (PIXE), LA-ICP-MS, LA-ICP-MS, ICP-MS, XRF, XRF, XRF, XRF, XRF                                                                                     |
| 90 | Th | 36                                 | LA-ICP-MS                                                                                                                                                                                   |
| 92 | U  | 12,36                              | LA-ICP-MS, LA-ICP-MS                                                                                                                                                                        |

Supplementary Table S2. Details of the technique based on dichroism. Details of polarization-dependent imaging contrast (PIC) mapping – Photoemission electron microscopy (PEEM) – Dichroism – X-ray polarization – X-ray linear dichroic on mineral, tooth, bone and apatite.

| References | Sample                       | Acquisition location – Analysis – Information                                                                          | Element and edge                                                 | Energy                                                                     | Map acquired                   | Resolution Pixel size |
|------------|------------------------------|------------------------------------------------------------------------------------------------------------------------|------------------------------------------------------------------|----------------------------------------------------------------------------|--------------------------------|-----------------------|
| 50         |                              | Theory                                                                                                                 |                                                                  |                                                                            |                                |                       |
| 51         | Nacre                        | Synchrotron (SR) – PhotoEmission Electron spectro-Microscopy (PEEM) SPHINX X-PEEM – Synchrotron Radiation Center (SRC) | C K-edge $\pi^*$ and $\sigma^*$ , O $\pi^*$ pre-edge             | 290.3 and 302 eV, 534 and 531.7 eV                                         | Distribution map               | -                     |
| 52         | Red abalone                  | SR – SPHINX and PEEM-3 – SRC and ALS                                                                                   | O and C $\pi^*$ and $\sigma^*$ , Ca L-edge                       | 534 and 518 eV, 534 and 540 eV, 290.3 and 302 eV, 351.6 and 345 eV         | PIC map                        | -                     |
| 53         | Red abalone                  | SR – SPHINX X-PEEM – SRC – ALS                                                                                         | C K-edge and O K-edge, Ca L-edge                                 | 290.3 and 302 eV, 534 and 531.7 eV, 351.4 and 344.4 eV, 352.7 and 343.7 eV | PIC map                        | -                     |
| 54         | Sea urchin tooth             | SR – PEEM-3 – ALS                                                                                                      | Ca L-edge, Ca L <sub>2</sub> , Mg K-edge, $\pi^*$ and $\sigma^*$ | 352.6 and 342 eV, 1315 and 1309 eV, 290.3 and 302 eV                       | PIC map $\pi^*$ and $\sigma^*$ | 20 nm for Ca          |
| 55         | Sea urchin tooth             | SR – SPHINX X-PEEM – SRC                                                                                               | C K-edge $\pi^*$ and $\pi^*$ and O                               | 290.3 and 302 eV, 534 and 540 eV                                           | X-PEEM map, PIC map            | 20 nm, resolution     |
| 56         | Calcite (CaCO <sub>3</sub> ) | SR – PEEM-3 – ALS                                                                                                      | C K-edge $\pi^*$ (290.3 eV)                                      | 290.3 eV, 280 to 320 eV                                                    | X-PEEM images                  | 10 and 30 nm pixel    |

|    |                                                                          |                                                |                                              |                                                                    |                                            |                                                                                 |
|----|--------------------------------------------------------------------------|------------------------------------------------|----------------------------------------------|--------------------------------------------------------------------|--------------------------------------------|---------------------------------------------------------------------------------|
| 57 |                                                                          | Review                                         |                                              |                                                                    |                                            |                                                                                 |
| 58 | Shells, nacre, $\text{CaCO}_3$                                           | SR – PEEM-3 – ALS                              | C K-edge $\pi^*$ (290.3 eV)                  | 290.3 eV                                                           | PIC map                                    | 20 nm pixel                                                                     |
| 59 | Shells, nacre                                                            | SR – PEEM-3 – ALS                              | C K-edge $\pi^*$ (290.3 eV)                  | 290.3 eV                                                           | PIC map                                    | 20 nm pixel                                                                     |
| 60 | Shells                                                                   | SR – PEEM-3 – ALS                              | -                                            | -                                                                  | PIC map                                    | ~ 20 nm pixel                                                                   |
| 61 | Calcium carbonate, calcite, vaterite, $\text{CaCO}_3$ , monohydrocalcite | SR – PEEM-3 – ALS                              | O K-edge, C K-edge                           | 525 to 555 eV, 534 eV and 290.3 eV                                 | PIC map                                    | 20 nm pixel                                                                     |
| 62 | Aragonite, calcite, shell                                                | SR – X-PEEM microscope – Canadian Light Source | C $\pi^*$ , O $\pi^*$ , Ca L-edge            | 290.3 and 301. eV, 351.3 and 343 eV, 351 and 343 eV, 338 to 370 eV | PIC map                                    | -                                                                               |
| 63 | <i>Haliotis rufescens</i> , red abalone, coral, nacre, $\text{CaCO}_3$   | SR – PEEM-3 – ALS                              | O K-edge $\pi^*$ (534 eV), Ca L-edge         | 534 eV, 340 to 360 eV                                              | PIC map for O                              | 20 nm pixel size                                                                |
| 64 | Tunicate Herdmania momus, Vaterite, $\text{CaCO}_3$                      | SR – PEEM-3 – ALS                              | O K-edge $\pi^*$ (534 eV)                    | 534 eV                                                             | PIC map                                    | 20 nm resolution                                                                |
| 65 | Human bone                                                               | SR – X-ray microscope ID21 – ESRF              | Ca K-edge                                    | 4.02 to 4.15 keV, 4054.0 and 4055.0 eV                             | XANES in transmission and reflection - XRF | 0.8×1.0 $\mu\text{m}^2$ – 0.7×0.7 $\mu\text{m}^2$ or of 0.3×0.3 $\mu\text{m}^2$ |
| 66 | Human tooth, HAp                                                         | SR – X-ray microscope ID21 – ESRF              | Ca K-edge                                    | 4055 and 4053 eV, 4150 eV                                          | Micro XANES                                | 0.8×1.0 $\mu\text{m}^2$                                                         |
| 67 | Calcium carbonate, $\text{CaCO}_3$                                       | Calculation                                    | Ca $\text{L}_{23}$ -edge                     |                                                                    |                                            | -                                                                               |
| 68 | Fossil nacre                                                             | SR – PEEM-3 – ALS                              | O K-edge (534 eV)                            | 525 and 555 eV, 534 eV                                             | PIC map                                    | -                                                                               |
| 69 | Parrotfish teeth, $\text{Ca}_5(\text{PO}_4)_3\text{F}$                   | SR – PEEM-3 – ALS                              | Ca $\text{L}_{23}$ -edge, C K-edge, O K-edge | 352.6 eV and 351.6 eV, 340-360 eV                                  | PIC map                                    | 20 nm resolution                                                                |

|    |                                                                                                 |                                                                                   |                                                          |                                                                            |                              |                                                                                       |
|----|-------------------------------------------------------------------------------------------------|-----------------------------------------------------------------------------------|----------------------------------------------------------|----------------------------------------------------------------------------|------------------------------|---------------------------------------------------------------------------------------|
| 70 | Coral skeletons<br>CaCO <sub>3</sub><br>amorphous<br>calcium<br>carbonate                       | SR – Photoelectron<br>emission<br>spectromicroscopy<br>PEEM-3 – ALS               | O K-edge<br>$\pi^*$ (534<br>eV), Ca L-<br>edge           | 534 eV,<br>340 to<br>360 eV,                                               | PIC map                      | 20 nm<br>pixel                                                                        |
| 71 | Coral skeletons<br>CaCO <sub>3</sub> , synthetic<br>aragonite (SA)<br>spherulites               | SR- PEEM-3 – ALS                                                                  | O K-edge<br>$\pi^*$ (534<br>eV)                          | 5354 eV                                                                    | PIC map                      | -                                                                                     |
| 72 |                                                                                                 | Review                                                                            |                                                          |                                                                            |                              | -                                                                                     |
| 73 | FAp, HAp,<br>dentine,<br>enameloid,<br>parrotfish,<br>lamellar bone,<br>mouse incisor           | SR – PEEM-3 – ALS                                                                 | Ca L-edge<br>and Ca K-<br>edge                           | 352.8<br>and<br>352.4 eV,<br>$\pm 0.2$ eV                                  | PIC map                      | 20, 57 and<br>60 nm<br>pixel                                                          |
| 74 |                                                                                                 | Review                                                                            |                                                          |                                                                            |                              | -                                                                                     |
| 42 | Human tooth<br>Enamel dentine<br>HAp                                                            | SR – scanning X-ray<br>microscopy – ESRF                                          | Ca K-edge<br>(4.1 keV)                                   | 4.0553<br>and<br>4.0533<br>keV and<br>4.2 keV,<br>4.032 to<br>4.122<br>keV | Micro XRF<br>maps -<br>XANES | Pixel size 1<br>or 2 $\mu\text{m}$ –<br>Beam $\sim 0.6$<br>$\times 0.8 \mu\text{m}^2$ |
| 43 | Human tooth<br>enamel                                                                           | SR – PEEM-3<br>microscopy<br>beamline – ALS                                       | Ca L-edge<br>(352.6 eV)                                  | 352.6<br>$\pm 0.2$ eV                                                      | PIC map                      | 22 nm $\times$<br>22 nm $\times$ 3<br>nm, 57 $\times$<br>57 $\times$ 3 nm             |
| 75 | Ant head<br>MgCO <sub>3</sub>                                                                   | SR – X-ray<br>PhotoEmission<br>Electron spectro-<br>Microscopy (X-<br>PEEM) – ALS | C K-edge,<br>O K-edge<br>$\pi^*$ (534<br>eV)             | 280-320<br>eV<br>525-555<br>eV, 534<br>eV                                  | PIC map for<br>O             | -                                                                                     |
| 76 | Coral skeletons,<br>spherulitic crystal<br>fibers, CaCO <sub>3</sub>                            | SR – PEEM-3 – ALS                                                                 | O K-edge<br>$\pi^*$ (534<br>eV)                          | 534 eV                                                                     | PIC map                      | 20 and 60<br>nm pixel                                                                 |
| 77 | Sheep enamel<br>HAp,<br>Synthetic<br>fluorapatite<br>dumbbells, and<br>review previous<br>works | SR – PEEM3<br>microscopy – ALS                                                    | Ca L-edge                                                | $\pm 0.2$ eV                                                               | PIC map                      | 60 nm<br>pixel                                                                        |
| 78 | Rat bone                                                                                        | SR – UE56/2 PGM<br>– BESSY II<br>synchrotron light<br>source                      | Ca 2p<br>edge, Ca<br>L <sub>2,3</sub> and O<br>K-edge 1s | 350 and<br>535 eV                                                          | NEXAFS                       | Focal spot<br>1 $\times$ 1 mm <sup>2</sup>                                            |



|    |                                               |                   |                                     |                                                                          |                          |                            |
|----|-----------------------------------------------|-------------------|-------------------------------------|--------------------------------------------------------------------------|--------------------------|----------------------------|
| 79 | Coral                                         | SR – PEEM – ALS   | Ca L-edge and K-edge $\pi^*$        | 534 eV                                                                   | PIC map and PEEM images  | Resolution 60 nm           |
| 80 | Coral skeletons, $\text{CaCO}_3$              | SR – PEEM-3 – ALS | O K-edge $\pi^*$                    | 534.5 eV, 1.5 eV below $\pi^*$ , 536.5 eV, 0.5 eV after $\pi^*$ , 536 eV | PIC map and ptychography | Resolution 35 nm and 60 nm |
| 77 | Teeth enamel, human, mouse, sheep, parrotfish | SR – PEEM-3 – ALS | Ca L-edge                           | $\pm 0.2$ eV                                                             | PIC map                  | -                          |
| 81 | Dolomitic ooid                                | SR – PEEM – ALS   | Carbonate O K-edge $\pi^*$ (534 eV) | 534 eV                                                                   | PIC map                  | 56 nm                      |
| 82 | Review                                        |                   |                                     |                                                                          |                          |                            |
| 83 | Biominerals                                   | SR – PEEM-3 – ALS | O K-edge Carbonate $\pi^*$ (534 eV) | 534 eV                                                                   | PIC map                  | down to 10 nm              |
| 84 | Sea urchin spine                              | SR – PEEM – ALS   | Ca L-edge                           | 340 to 360 eV                                                            | PEEM                     | ~60 nm                     |
| 85 | Dolomitic ooid                                | SR – PEEM – ALS   | Carbonate O K-edge $\pi^*$ (534 eV) | 534 eV                                                                   | PIC map                  | 56 nm                      |
| 86 | Black drum fish teeth                         | SR – PEEM3 – ALS  | Ca L-edge                           | $\pm 0.2$ eV                                                             | PIC map                  | -                          |
| 87 | Mice incisor enamel                           | SR – PEEM3 – ALS  | Ca L-edge                           | $\pm 0.2$ eV                                                             | PIC map                  | 20 and 60 nm               |
| 88 | Coral skeleton                                | SR – PEEM – ALS   | Ca L-edge                           | 340 and 360 eV                                                           | PEEM                     | 24, 54 and 56 nm           |
| 89 | $\text{CaCO}_3$ biominerals                   | SR – PEEM – ALS   | Carbonate O K-edge $\pi^*$ (534 eV) | 534 eV                                                                   | PIC map                  | Resolution 20 nm           |

## References

- 1 Yun, F. *et al.* Nanoscale pathways for human tooth decay – central planar defect, organic-rich precipitate and high-angle grain boundary. *Biomaterials* **235**, 119748, doi:https://doi.org/10.1016/j.biomaterials.2019.119748 (2020).
- 2 Ortiz-Ruiz, A. J. *et al.* Structural differences in enamel and dentin in human, bovine, porcine, and ovine teeth. *Annals of Anatomy - Anatomischer Anzeiger* **218**, 7-17, doi:https://doi.org/10.1016/j.aanat.2017.12.012 (2018).
- 3 Desoutter, A. *et al.* Cross striation in human permanent and deciduous enamel measured with confocal Raman microscopy. *Journal of Raman Spectroscopy* **50**, 548-556, doi:10.1002/jrs.5555 (2019).
- 4 Li, Z., Al-Jawad, M., Siddiqui, S. & Pasteris, J. D. A mineralogical study in contrasts: highly mineralized whale rostrum and human enamel. *Scientific Reports* **5**, 16511, doi:10.1038/srep16511 (2015).
- 5 Zenóbio, M. A. F., Tavares, M. S. N., Zenóbio, E. G. & Silva, T. A. Elemental composition of dental biologic tissues: study by means of different analytical techniques. *Journal of Radioanalytical and Nuclear Chemistry* **289**, 161-166, doi:10.1007/s10967-011-1067-1 (2011).
- 6 Zamudio-Ortega, C. M. *et al.* Morphological, chemical and structural characterisation of deciduous enamel: SEM, EDS, XRD, FTIR and XPS analysis. *European Journal Paediatric Dentistry* **15**, 275-280 (2014).
- 7 Melin, L. *et al.* XRMA and ToF-SIMS analysis of normal and hypomineralized enamel. *Microscopy and Microanalysis* **21**, 407-421, doi:10.1017/S1431927615000033 (2015).
- 8 Seredin, P. V. & Melkumov, V. N. Research hydroxyapatite crystals and organic components of hard tooth tissues affected by dental caries using Ftir-microspectroscopy and XRD-microdiffraction. *World Applied Sciences Journal* **31**, 2101-2107 (2014).
- 9 Goloshchapov, D. *et al.* Raman and XANES spectroscopic study of the influence of coordination atomic and molecular environments in biomimetic composite materials integrated with dental tissue. *Nanomaterials (Basel, Switzerland)* **11**, 3099, doi:10.3390/nano11113099 (2021).
- 10 Spizzirri, P. G., Cochrane, N. J., Prawer, S. & Reynolds, E. C. A comparative study of carbonate determination in human teeth using Raman spectroscopy. *Caries Research* **46**, 353-360, doi:10.1159/000337398 (2012).
- 11 Curzon, M. E. J. & Crocker, D. C. Relationships of trace elements in human tooth enamel to dental caries. *Archives of Oral Biology* **23**, 647-653, doi:https://doi.org/10.1016/0003-9969(78)90189-9 (1978).
- 12 Joannes-Boyau, R. *et al.* Elemental signatures of Australopithecus africanus teeth reveal seasonal dietary stress. *Nature* **572**, 112-115, doi:10.1038/s41586-019-1370-5 (2019).
- 13 DeRocher, K. A. *et al.* Chemical gradients in human enamel crystallites. *Nature* **583**, 66-71, doi:https://doi.org/10.1038/s41586-020-2433-3 (2020).
- 14 Teruel, J. d. D., Alcolea, A., Hernández, A. & Ruiz, A. J. O. Comparison of chemical composition of enamel and dentine in human, bovine, porcine and ovine teeth. *Archives of Oral Biology* **60**, 768-775, doi:10.1016/j.archoralbio.2015.01.014 (2015).
- 15 Buchwald, T. & Buchwald, Z. Assessment of the Raman spectroscopy effectiveness in determining the early changes in human enamel caused by artificial caries. *Analyst* **144**, 1409-1419, doi:10.1039/C8AN01494A (2019).
- 16 Buchwald, T., Okulus, Z. & Szybowicz, M. Raman spectroscopy as a tool of early dental caries detection—new insights. *Journal of Raman Spectroscopy* **48**, 1094-1102, doi:10.1002/jrs.5175 (2017).
- 17 Slimani, A. *et al.* Confocal Raman mapping of collagen cross-link and crystallinity of human dentin–enamel junction. *Journal of Biomedical Optics* **22**, 086003 (2017).

- 18 Al-Obaidi, R. *et al.* Chemical & nano-mechanical study of artificial human enamel subsurface lesions. *Scientific Reports* **8**, 4047, doi:10.1038/s41598-018-22459-7 (2018).
- 19 Lou, L., Nelson, A. E., Heo, G. & Major, P. W. Surface chemical composition of human maxillary first premolar as assessed by X-ray photoelectron spectroscopy (XPS). *Applied Surface Science* **254**, 6706-6709, doi:https://doi.org/10.1016/j.apsusc.2008.04.085 (2008).
- 20 Kis, V. K. *et al.* Magnesium incorporation into primary dental enamel and its effect on mechanical properties. *Acta Biomaterialia* **120**, 104-115, doi:https://doi.org/10.1016/j.actbio.2020.08.035 (2021).
- 21 Abdallah, M.-N. *et al.* Diagenesis-inspired reaction of magnesium ions with surface enamel mineral modifies properties of human teeth. *Acta Biomaterialia* **37**, 174-183, doi:10.1016/j.actbio.2016.04.005 (2016).
- 22 Zamudio-Ortega, C. M. *et al.* Morphological and chemical changes of deciduous enamel produced by Er:YAG laser, fluoride, and combined treatment. *Photomedicine and Laser Surgery* **32**, 252-259, doi:10.1089/pho.2013.3622 (2014).
- 23 Srot, V., Bussmann, B., Salzberger, U., Koch, C. T. & van Aken, P. A. Linking microstructure and nanochemistry in human dental tissues. *Microscopy and Microanalysis* **18**, 509-523, doi:10.1017/S1431927612000116 (2012).
- 24 Sabel, N. *et al.* Elemental composition of normal primary tooth enamel analyzed with XRMA and SIMS. *Swedish Dental Journal* **33**, 75-83 (2009).
- 25 Sabel, N., Karlsson, A. & Sjölin, L. XRMA analysis and X-ray diffraction analysis of dental enamel from human permanent teeth exposed to hydrogen peroxide of varying pH. *Journal of clinical and experimental dentistry* **11**, e512-e520, doi:10.4317/jced.55618 (2019).
- 26 Adriaens, A. The role of SIMS in understanding ancient materials. in *Radiation in Art and Archeometry* (eds D. C. Creagh & D. A. Bradley) 180-201 (Elsevier Science B.V., 2000), doi:https://doi.org/10.1016/B978-044450487-6/50055-9.
- 27 Xu, C., Reed, R., Gorski, J. P., Wang, Y. & Walker, M. P. The distribution of carbonate in enamel and its correlation with structure and mechanical properties. *Journal of Materials Science* **47**, 8035-8043, doi:10.1007/s10853-012-6693-7 (2012).
- 28 LeGeros, R. Z., Sakae, T., Bautista, C., Retino, M. & LeGeros, J. P. Magnesium and carbonate in enamel and synthetic apatites. *Advances in Dental Research* **10**, 225-231, doi:10.1177/08959374960100021801 (1996).
- 29 Cakir, F. Y., Korkmaz, Y., Firat, E., Oztas, S. S. & Gurgan, S. Chemical analysis of enamel and dentin following the application of three different at-home bleaching systems. *Operative Dentistry* **36**, 529-536, doi:10.2341/11-050-I (2011).
- 30 Buchwald, T. & Okulus, Z. Determination of storage solutions influence on human enamel by Raman spectroscopy. *Vibrational Spectroscopy* **96**, 118-124, doi:https://doi.org/10.1016/j.vibspec.2018.04.003 (2018).
- 31 Petersson, L. G., Odelius, H., Lodding, A., Larsson, S. J. & Frostell, G. Ion probe study of fluorine gradients in outermost layers of human enamel. *Journal of Dental Research* **55**, 980-990, doi:10.1177/00220345760550065001 (1976).
- 32 Mohammed, N. R. *et al.* Effects of fluoride on in vitro enamel demineralization analyzed by <sup>19</sup>F MAS-NMR. *Caries Research* **47**, 421-428, doi:10.1159/000350171 (2013).
- 33 Gómez, B. F. *et al.* Effect of flavored water on the morphological and chemical composition of human dental enamel microstructure in vitro *South Florida Journal of Development* **2**, 1724-1732, doi:https://doi.org/10.46932/sfjdv2n2-047 (2021).
- 34 Anwar Chaudhri, M. & Ainsworth, T. Applications of PIXE to studies in dental and mental healths. *Nuclear Instruments and Methods* **181**, 333-336, doi:https://doi.org/10.1016/0029-554X(81)90632-7 (1981).
- 35 Cucina, A., Dudgeon, J. & Neff, H. Methodological strategy for the analysis of human dental enamel by LA-ICP-MS. *Journal of Archaeological Science* **34**, 1884-1888, doi:https://doi.org/10.1016/j.jas.2007.01.004 (2007).

- 36 Guede, I. *et al.* Analyses of human dentine and tooth enamel by laser ablation-inductively coupled plasma-mass spectrometry (LA-ICP-MS) to study the diet of medieval Muslim individuals from Tauste (Spain). *Microchemical Journal* **130**, 287-294, doi:<https://doi.org/10.1016/j.microc.2016.10.005> (2017).
- 37 Kang, D., Amarasiriwardena, D. & Goodman, A. H. Application of laser ablation–inductively coupled plasma-mass spectrometry (LA–ICP–MS) to investigate trace metal spatial distributions in human tooth enamel and dentine growth layers and pulp. *Analytical and Bioanalytical Chemistry* **378**, 1608-1615, doi:10.1007/s00216-004-2504-6 (2004).
- 38 Harris, H. H., Vogt, S., Eastgate, H. & Lay, P. A. A link between copper and dental caries in human teeth identified by X-ray fluorescence elemental mapping. *JBIC Journal of Biological Inorganic Chemistry* **13**, 303-306, doi:10.1007/s00775-007-0321-z (2008).
- 39 Liu, H.-Y. *et al.* Study of P, Ca, Sr, Ba and Pb levels in enamel and dentine of human third molars for environmental and archaeological research. *Advances in Anthropology* **3**, 71-77, doi:10.4236/aa.2013.32010 (2013).
- 40 Carvalho, M. L., Casaca, C., Marques, J. P., Pinheiro, T. & Cunha, A. S. Human teeth elemental profiles measured by synchrotron x-ray fluorescence: dietary habits and environmental influence. *X-Ray Spectrometry* **30**, 190-193, doi:10.1002/xrs.487 (2001).
- 41 Dean, M. C., Spiers, K. M., Garrevoet, J. & Le Cabec, A. Synchrotron X-ray fluorescence mapping of Ca, Sr and Zn at the neonatal line in human deciduous teeth reflects changing perinatal physiology. *Archives of Oral Biology* **104**, 90-102, doi:<https://doi.org/10.1016/j.archoralbio.2019.05.024> (2019).
- 42 Hesse, B., Stier, D., Cotte, M., Forien, J.-B. & Zaslansky, P. Polarization induced contrast X-ray fluorescence at submicrometer resolution reveals nanometer apatite crystal orientations across entire tooth sections. *Biomedical Optics Express* **10**, 18-28, doi:10.1364/BOE.10.000018 (2019).
- 43 Beniash, E. *et al.* The hidden structure of human enamel. *Nature Communications* **10**, 4383, doi:<https://doi.org/10.1038/s41467-019-12185-7> (2019).
- 44 Anjos, M. J. *et al.* Elemental mapping of teeth using  $\mu$ SRXRF. *Nuclear Instruments and Methods in Physics Research Section B: Beam Interactions with Materials and Atoms* **213**, 569-573, doi:[https://doi.org/10.1016/S0168-583X\(03\)01673-2](https://doi.org/10.1016/S0168-583X(03)01673-2) (2004).
- 45 Carvalho, M. L., Marques, A. F., Marques, J. P. & Casaca, C. Evaluation of the diffusion of Mn, Fe, Ba and Pb in Middle Ages human teeth by synchrotron microprobe X-ray fluorescence. *Spectrochimica Acta Part B: Atomic Spectroscopy* **62**, 702-706, doi:<https://doi.org/10.1016/j.sab.2007.02.011> (2007).
- 46 Carvalho, M. L., Marques, J. P., Marques, A. F. & Casaca, C. Synchrotron microprobe determination of the elemental distribution in human teeth of the Neolithic period. *X-Ray Spectrometry* **33**, 55-60, doi:<https://doi.org/10.1002/xrs.705> (2004).
- 47 Besnard, C. *et al.* Nanoscale correlative X-ray spectroscopy and ptychography of carious dental enamel. *Materials & Design* **224**, 111272, doi:<https://doi.org/10.1016/j.matdes.2022.111272> (2022).
- 48 Marques, A. F., Marques, J. P., Casaca, C. & Carvalho, M. L. X-ray microprobe synchrotron radiation X-ray fluorescence application on human teeth of renal insufficiency patients. *Spectrochimica Acta Part B: Atomic Spectroscopy* **59**, 1675-1680, doi:<https://doi.org/10.1016/j.sab.2004.07.017> (2004).
- 49 Carvalho, M. L. *et al.* Analysis of human teeth and bones from the chalcolithic period by X-ray spectrometry. *Nuclear Instruments and Methods in Physics Research Section B: Beam Interactions with Materials and Atoms* **168**, 559-565, doi:[https://doi.org/10.1016/S0168-583X\(00\)00049-5](https://doi.org/10.1016/S0168-583X(00)00049-5) (2000).
- 50 Brouder, C. Angular dependence of X-ray absorption spectra. *Journal of Physics: Condensed Matter* **2**, 701-738, doi:10.1088/0953-8984/2/3/018 (1990).

- 51 Metzler, R. A. *et al.* Architecture of columnar nacre, and implications for its formation mechanism. *Physical Review Letters* **98**, 268102 (2007).
- 52 Gilbert, P. U. P. A. *et al.* Gradual ordering in red abalone nacre. *Journal of the American Chemical Society* **130**, 17519-17527, doi:10.1021/ja8065495 (2008).
- 53 Metzler, R. A. *et al.* Polarization-dependent imaging contrast in abalone shells. *Physical Review B* **77**, 064110-064112-064110-064119 (2008).
- 54 Killian, C. E. *et al.* Mechanism of calcite co-orientation in the sea urchin tooth. *Journal of the American Chemical Society* **131**, 18404-18409, doi:10.1021/ja907063z (2009).
- 55 Ma, Y. *et al.* The grinding tip of the sea urchin tooth exhibits exquisite control over calcite crystal orientation and Mg distribution. *Proceedings of the National Academy of Sciences of the United States of America* **106**, 6048-6053, doi:10.1073/pnas.0810300106 (2009).
- 56 Gilbert, P. U. P. A., Young, A. & Coppersmith, S. N. Measurement of *c*-axis angular orientation in calcite (CaCO<sub>3</sub>) nanocrystals using X-ray absorption spectroscopy. *Proceedings of the National Academy of Sciences* **108**, 11350-11355, doi:10.1073/pnas.1107917108 (2011).
- 57 Gilbert, P. U. P. A. Polarization-dependent imaging contrast (PIC) mapping reveals nanocrystal orientation patterns in carbonate biominerals. *Journal of Electron Spectroscopy and Related Phenomena* **185**, 395-405, doi:https://doi.org/10.1016/j.elspec.2012.06.001 (2012).
- 58 Olson, I. C., Kozdon, R., Valley, J. W. & Gilbert, P. U. P. A. Mollusk shell nacre ultrastructure correlates with environmental temperature and pressure. *Journal of the American Chemical Society* **134**, 7351-7358, doi:10.1021/ja210808s (2012).
- 59 Olson, I. C. *et al.* Crystal nucleation and near-epitaxial growth in nacre. *Journal of Structural Biology* **184**, 454-463, doi:https://doi.org/10.1016/j.jsb.2013.10.002 (2013).
- 60 Olson, I. C. *et al.* Crystal lattice tilting in prismatic calcite. *Journal of Structural Biology* **183**, 180-190, doi:https://doi.org/10.1016/j.jsb.2013.06.006 (2013).
- 61 DeVol, R. T. *et al.* Oxygen spectroscopy and polarization-dependent imaging contrast (PIC)-mapping of calcium carbonate minerals and biominerals. *The Journal of Physical Chemistry B* **118**, 8449-8457, doi:10.1021/jp503700g (2014).
- 62 Metzler, R. A. & Rez, P. Polarization dependence of aragonite calcium L-edge XANES spectrum indicates *c* and *b* axes orientation. *The Journal of Physical Chemistry B* **118**, 6758-6766, doi:10.1021/jp503565e (2014).
- 63 DeVol, R. T. *et al.* Nanoscale transforming mineral phases in fresh nacre. *Journal of the American Chemical Society* **137**, 13325-13333, doi:10.1021/jacs.5b07931 (2015).
- 64 Pokroy, B. *et al.* Narrowly distributed crystal orientation in biomineral vaterite. *Chemistry of Materials* **27**, 6516-6523, doi:10.1021/acs.chemmater.5b01542 (2015).
- 65 Hesse, B. *et al.* Full-field calcium K-edge X-ray absorption near-edge structure spectroscopy on cortical bone at the micron-scale: polarization effects reveal mineral orientation. *Analytical Chemistry* **88**, 3826-3835, doi:10.1021/acs.analchem.5b04898 (2016).
- 66 Hesse, B., Zaslansky, P., Salome, M., Castillo, H. & Cotte, M. Angular-dependent absorption spectroscopy reveals apatite crystal orientation in human teeth. in *XRM2016: 13<sup>th</sup> International Conference on X-Ray Microscopy*. (Oxford, United Kingdom, 2016).
- 67 Krüger, P. & Natoli, C. R. Theory of x-ray absorption and linear dichroism at the Ca L<sub>23</sub>-edge of CaCO<sub>3</sub>. *Journal of Physics: Conference Series* **712**, 012007, doi:10.1088/1742-6596/712/1/012007 (2016).
- 68 Gilbert, P. U. P. A. *et al.* Nacre tablet thickness records formation temperature in modern and fossil shells. *Earth and Planetary Science Letters* **460**, 281-292, doi:https://doi.org/10.1016/j.epsl.2016.11.012 (2017).
- 69 Marcus, M. A. *et al.* Parrotfish teeth: stiff biominerals whose microstructure makes them tough and abrasion-resistant to bite stony corals. *ACS Nano* **11**, 11856-11865, doi:10.1021/acsnano.7b05044 (2017).



- 70 Mass, T. *et al.* Amorphous calcium carbonate particles form coral skeletons. *Proceedings of the National Academy of Sciences* **114**, E7670-E7678, doi:10.1073/pnas.1707890114 (2017).
- 71 Sun, C.-Y. *et al.* Spherulitic growth of coral skeletons and synthetic aragonite: nature's three-dimensional printing. *ACS Nano* **11**, 6612-6622, doi:10.1021/acsnano.7b00127 (2017).
- 72 Gilbert, P. U. P. A. Polarization-dependent imaging contrast (PIC) mapping in 2018. *Microscopy and Microanalysis* **24**, 454-457, doi:10.1017/S1431927618014514 (2018).
- 73 Stifler, C. A. *et al.* X-ray linear dichroism in apatite. *Journal of the American Chemical Society* **140**, 11698-11704, doi:https://doi.org/10.1021/jacs.8b05547 (2018).
- 74 Gilbert, P. U. P. A. & Stifler, C. A. See-through teeth, clearly. *Matter* **1**, 27-29, doi:https://doi.org/10.1016/j.matt.2019.06.015 (2019).
- 75 Li, H. *et al.* Biomineral armor in leaf-cutter ants. *bioRxiv*, 2020.2005.2018.102962, doi:10.1101/2020.05.18.102962 (2020).
- 76 Sun, C.-Y. *et al.* Crystal nucleation and growth of spherulites demonstrated by coral skeletons and phase-field simulations. *Acta Biomaterialia*, doi:https://doi.org/10.1016/j.actbio.2020.06.027 (2020).
- 77 Stifler, C. A. *et al.* Crystal misorientation correlates with hardness in tooth enamels☆. *Acta Biomaterialia* **120**, 124-134, doi:https://doi.org/10.1016/j.actbio.2020.07.037 (2021).
- 78 Konashuk, A. S., Brykalova, X. O., Kornilov, N. N., Filatova, E. O. & Pavlychev, A. A. Hierarchy-induced X-ray linear dichroism in cortical bone. *Emergent Materials* **3**, 515-520, doi:10.1007/s42247-020-00105-1 (2020).
- 79 Sun, C.-Y. *et al.* From particle attachment to space-filling coral skeletons. *Proceedings of the National Academy of Sciences*, 202012025, doi:10.1073/pnas.2012025117 (2020).
- 80 Lo, Y. H. *et al.* X-ray linear dichroic ptychography. *Proceedings of the National Academy of Sciences* **118**, e2019068118, doi:10.1073/pnas.2019068118 (2021).
- 81 Wilcots, J., Gilbert, P. U. & Bergmann, K. D. Nanoscale crystal fabric of primary Ediacaran dolomite. *Earth and Space Science Open Archive*, 15, doi:doi:10.1002/essoar.10507750.2 (2021).
- 82 Gránásy, L. *et al.* Phase-field modeling of biomineralization in mollusks and corals: microstructure vs formation mechanism. *JACS Au* **1**, 1014-1033, doi:https://doi.org/10.1021/jacsau.1c00026 (2021).
- 83 Lew, A. J., Stifler, C. A., Schmidt, C. A., Buehler, M. J. & Gilbert, P. U. P. A. Small-misorientation toughness in biominerals evolved convergently. *arXiv.org*, arXiv:2108.07877 (2021).
- 84 Stifler, C. A., Killian, C. E. & Gilbert, P. U. P. A. Evidence for a liquid precursor to biomineral formation. *Crystal Growth & Design* **21**, 6635-6641, doi:10.1021/acs.cgd.1c00865 (2021).
- 85 Wilcots, J., Gilbert, P. U. & Bergmann, K. D. Nanoscale crystal fabric preserved in dolomite ooids at the onset of the Shuram Excursion. *Earth and Space Science Open Archive*, 19, doi:doi:10.1002/essoar.10507750.3 (2021).
- 86 Deng, Z. *et al.* Black drum fish teeth: built for crushing mollusk shells. *Acta Biomaterialia* **137**, 147-161, doi:https://doi.org/10.1016/j.actbio.2021.10.023 (2022).
- 87 Stifler, C. A., Yamazaki, H., Gilbert, P. U. P. A., Margolis, H. C. & Beniash, E. Loss of biological control of enamel mineralization in amelogenin-phosphorylation-deficient mice. *Journal of Structural Biology* **214**, 107844, doi:https://doi.org/10.1016/j.jsb.2022.107844 (2022).
- 88 Schmidt, C. A. *et al.* Faster crystallization during coral skeleton formation correlates with resilience to ocean acidification. *Journal of the American Chemical Society* **144**, 1332-1341, doi:10.1021/jacs.1c11434 (2022).
- 89 Gilbert, P. *et al.* Convergent, slightly misoriented crystals toughen corals and seashells. *Research Square*, doi:https://doi.org/10.21203/rs.3.rs-1879515/v1 (2022).
